# Supplementary material for: ERAP1 Regulates Natural Killer Cell Function by Controlling the Engagement of Inhibitory Receptors
Source: Oxford University Press journal article supplement (doi:10.1158/0008-5472.can-14-1643), 2015-01-15
Supplement: 00085472can141643-sup-132624_2_supp_2782851_ngh6kl.doc [file 00085472can141643-sup-132624_2_supp_2782851_ngh6kl.doc]

**Supplementary information**

**Supplemental Figure legends**

**Figure S1**

**Expression of ERAP1 in HeLa cells transduced with different ERAP1 shRNA constructs**

(A) qPCR and (B) immunoblotting analyses of ERAP1 expression in HeLa cell line transduced with lentiviral vectors encoding a non-target shRNA control (shCTRL) or the indicated ERAP1 shRNAs targeting different sequences of human ERAP1. -actin was used for normalization in both assays. Densitometric analysis of Western blots of ERAP1 and ERAP2 is shown.

**Figure S2**

**CD56dim NK-cell subset is highly responsive to stimulation with K562 cells**

Gating scheme for analysis of CD107a on human CD3- CD56+ NK cells from a healthy donor co-cultured with medium (upper panels) or K562 (lower panels). Percentages of CD107a+ NK cells are indicated.

**Figure S3**

**Pulsing with high-affinity peptides did not affect MHC class I surface expression in shERAP1-DAOY cells**

Flow cytometric analysis with mAb W6/32 of surface MHC-I expression in the indicated cells pre-treated with low pH buffer acid to allow dissociation of preformed pMHC- I complexes and pulsed or not (no peptide) with the indicated peptides. Isotype-matched control antibody staining did not exceed an MFI value of 5.

**Figure S4**

**Gating strategy used to analyse degranulation of single NK-cell subsets by flow cytometry**

After gating lymphocytes (forward scatter versus side scatter), NK cells were identified by gating on CD56+ cells and excluding CD3- T cells. Then, gates were set on NKG2A positive (NKG2A+) and NKG2A negative(NKG2A-)NK-cell subsets and both were gated out for further stratification into KIR2DL1 positive cells (blue), KIR2DL1/KIR3DL1 double positive cells (light green), KIR3DL1positive cells (red), and KIR2DL1/KIR3DL1 double negative cells (violet). Each subset was further gated on KIR2DL3positive and KIR2DL3negative NK cell subsets. This allows to distinguish NK cells expressing single positive (sp) (2DL1sp, 3DL1sp, 2DL3sp in blue, red and violet, respectively), triple positive (tp) (light green) and triple negatives (tn) (dark green) KIR subsets. KIRtn subsets allow us to distinguish the contribution of cells expressing NKG2A only. Percentage of CD107a expressing cells is indicated for each NK-cell subset.

**Figure S5**

**Leu-SH treatment did not affect surface expression of ligands for activating NK cell receptors on DAOY cells.**

Flow cytometric analysis of the indicated ligands for activating NK-cell receptors in DTT- and Leu-SH-treated DAOY cells (black and red lines, respectively). Isotype-matched negative control antibodies are displayed as dotted lines.

**Figure S6**

**KIR-Fc binding and percentage of CD107a+ NK cells in response to Leu-SH- and DTT-treated DAOY cells**

(A) Flow cytometric analysis of the binding of the indicated KIR-Fc fusion proteins to Leu-SH- and DTT-treated DAOY cells (black and red lines, respectively). Isotype-matched negative control antibodies are displayed as dotted lines. (B) Representative example of degranulation by human CD3- CD56+ NK cells from the donor D co-expressing KIR2DL1, KIR2DL3 and KIR3DL1 but not activating KIRs, measured as percentage of CD107a+ cells in response to Leu-SH- and DTT-treated DAOY cells. The colour code used to define the NK-cell subsets positive for single KIRs (KIRsp), NKG2A (NKG2Asp), or negative (n) for NKG2A and triple negative (tn) for KIRs (NKG2An, KIR tn) is shown in Figure S4. Percentage of CD107a expressing cells is indicated for each NK-cell subset.

**Figure S7**

**Distribution of HLA-B supertypes in LCLs clustered in three groups based on MHC-I fold changes.**

Distribution of HLA-B supertypes expressed by LCLs clustered in groups based on MHC-I fold change is indicated.

**Supplemental Tables**

**Table S1.**

**HLA class I genotype and KIR-ligand of tumor cell lines**

| **Cells** | **Origin** | **HLA-A** | ^**HLA-B** | ^**HLA-C** | **KIR ligand** |
| --- | --- | --- | --- | --- | --- |
| HeLa | Cervix | *68:02 | *15:03 | *16:04 | C1/C1 |
| DAOY | Medulloblastoma | *01:01/*02:01 | ***07:03**/*57:01 | ***06:02**/***07:02** | C1/C2, Bw4 |
| Raji | Lymphoma | *03 | *71 | *03/*04 | C1/C2 |
| MNT-1 | Melanoma | *23/*24 | *18/*44 | *04/*12 | C1/C2, Bw4, A Bw4 |
| SK-Mel-93 | Melanoma | *02/*31 | *21/***35** | *04 | C2/C2 |
| SK-N-SH | Melanoma | *01/*24 | *18/*49 | ***07** | C1/C1, Bw4, A Bw4 |

^HLA class I alleles belonging to the HLA-B7 supertype and HLA-C alleles that bind peptides with proline in p2 are indicated in bold.

**Table S2.**

**Peptides used in the study**

| **Peptide** | **Source** | **Sequence** | **MHC-I restriction** | **Ref** |
| --- | --- | --- | --- | --- |
| I9W | HIV GAG p24 (147-158) | ISPRTLNAW | HLA-B*57:01 | (1, 2) |
| T9I | CMV pp65 (211-219) | TRATKMQVI | HLA-C*06:02 | (3) |
| E9Y | WT1 (319-327) | EKRPFMCAY | HLA-C*07:02 | US2006/0217297A1 pat. |
| S8L | OVA (257–264) | SIINFEKL | H-2Kb | (4) |

**Table S3.**

**KIR ligands of donors with KIR genotype A/A**

| **Donor** | **C1** | **C2** | **Bw4T** | **Bw4I** | **A Bw4** | **Bw6** |
| --- | --- | --- | --- | --- | --- | --- |
| A | *07:02 | *05:01 | *44:02 |  | *24:02 | *07:02 |
| B | *07 | *15 |  | *51 |  | *07 |
| C | *01:02 | *02:02 |  | *51:01/*51:01 |  |  |
| D | *01 | *17 |  | *51 |  | *41 |

**Table S4.**

**KIR gene profile analysis of donors with genotype A/A**

| **Donor** | **2DL1** | **2DL2** | **2DL3** | **2DL4** | **2DL5** | **2DS1** | **2DS2** | **2DS3** | **2DS4** | **2DS5** | **3DL1** | **3DL2** | **3DL3** | **3DS1** | **2DP1** | **3DP1** |
| --- | --- | --- | --- | --- | --- | --- | --- | --- | --- | --- | --- | --- | --- | --- | --- | --- |
| A |  |  |  |  |  |  |  |  | **S4/** |  |  |  |  |  |  |  |
| B |  |  |  |  |  |  |  |  | **** |  |  |  |  |  |  |  |
| C |  |  |  |  |  |  |  |  | **S4/** |  |  |  |  |  |  |  |
| D |  |  |  |  |  |  |  |  | **** |  |  |  |  |  |  |  |

KIR gene profile analysis of donors was performed using SSP-PCR approach. The presence (grey boxes) or absence (white boxes) of the indicated KIR genes is displayed. Two different sets of primers were used to discriminate between *KIR2DS4* coding for membrane-bound receptors (S4) and *KIR2DS4* coding for putative soluble receptors ().

**Table S5.**

**HLA class I genotype of LCLs, KIR ligands, MHC-I fold change and L.U. 20%**

| **LCL** | **HLA-A** | **^HLA-B** | **^HLA-C** | **KIR ligand** | **MHC-I**  **DTT** | **MHC-I**  **Leu-SH** | **°MHC-I ratio (%)** | **L.U. 20%**  **DTT** | **L.U. 20%**  **Leu-SH** |
| --- | --- | --- | --- | --- | --- | --- | --- | --- | --- |
| 1 | *03:01/*24:02 | ***07:02**/*44:03 | *04:01**/*07:02** | C1/C2, Bw4, A Bw4 | 579 | 288 | -50 | 9.1 | 22.2 |
| 2 | *03/*11 | *18/*49 | ***07**/*12 | C1/C1, Bw4 | 761 | 422 | -45 | 3.6 | 9.8 |
| 3 | *24:02/*30:01 | *08:01/*13:02 | ***06:02/*07:02** | C1/C2, A Bw4 | 626 | 438 | -30 | 0.1 | 1.0 |
| 4 | *02:01 | ***07:02/*55:01** | *03:03/*12:03 | C1/1 | 295 | 209 | -29 | 6.8 | 9.9 |
| 5 | *02:01/*03:01 | *18:01/***35:03** | *04:01**/*07:01** | C1/C2 | 350 | 283 | -19 | 0.5 | 2.7 |
| 6 | *02/*03 | ***07/*51** | ***07**/*14 | C1/C1, Bw4 | 407 | 343 | -16 | 0.2 | 2.2 |
| 7 | *02:01/*74:01 | *49:01/***55:01** | *03:03/***07:01** | C1/C1, Bw4 | 814 | 734 | -10 | 23.4 | 36.4 |
| 8 | *33/*68 | *13/*14 | ***06**/*08 | C1/C2 | 279 | 272 | -2 | 0.001 | 0.004 |
| 9 | *02:01/*11:01 | *08:01/*44:02 | *04:01/*16:04 | C1/C2, Bw4 | 273 | 271 | -1 | 1.6 | 5,6 |
| 10 | *31/*33 | *18/***35** | *04**/*06** | C2/C2 | 501 | 504 | 1 | 13.7 | 26.0 |
| 11 | *01/*02 | *08/***35** | *04**/*07** | C1/C2 | 353 | 360 | 2 | 0.004 | 0.0008 |
| 12 | *02:01/*26:01 | *13:02/***51:01** | ***06:02**/*15:02 | C2/C2, Bw4 | 386 | 447 | 16 | 0.02 | 2.4 |
| 13 | *02:01/*30:04 | *13:02/***35:01** | *04:01**/*07:01** | C1/C2 | 686 | 800 | 17 | 8.7 | 4.7 |
| 14 | *02:01/*02:09 | *15:17/***35:02** | *04:01**/*07:01** | C1/C2 | 669 | 781 | 17 | 0.0001 | 0.004 |
| 15 | *01:01/*68:01 | *08:01/*18:01 | ***07:01/*07:02** | C1/C1 | 861 | 1050 | 22 | 4.1 | 3.3 |
| 16 | *01:01/*30:04 | *46:01/*52:01 | ***07:01**/C*12:02 | C1/C1, Bw4 | 224 | 283 | 26 | nt | nt |
| 17 | *01:01/*23:01 | *08:01/***35:01** | *04:01**/*07:01** | C1/C2, A Bw4 | 872 | 1189 | 36 | 1.3 | 0.01 |
| 18 | *25/*29 | *18/*58 | ***07**/*12 | C1/C1, Bw4 | 220 | 329 | 50 | nt | nt |
| 19 | *02:05/*26:01 | *38:01/*50:01 | ***06:02**/*12:03 | C1/C2, Bw4 | 805 | 1294 | 60 | 3.3 | 6.0 |
| 20 | *01:01/*02:01 | ***35:03**/*39:06 | *04:01**/*07:02** | C1/C2 | 808 | 1294 | 60 | 9.7 | 8.8 |

^HLA class I alleles belonging to the HLA-B7 supertype and HLA-C alleles that bind peptides with proline in p2 are indicated in bold.

°Data are presented as indicated in Methods.

nt: not tested

Table S6.

| **LCL** | **2DL1** | **2DL2** | **2DL3** | **2DL4** | **2DL5** | **2DS1** | **2DS2** | **2DS3** | **2DS4** | **2DS5** | **3DL1** | **3DL2** | **3DL3** | **3DS1** | **2DP1** | **3DP1** | **genotype** |
| --- | --- | --- | --- | --- | --- | --- | --- | --- | --- | --- | --- | --- | --- | --- | --- | --- | --- |
| 1 |  |  |  |  |  |  |  |  | **** |  |  |  |  |  |  |  | **B/X** |
| 2 |  |  |  |  |  |  |  |  | **** |  | ***004/?** |  |  |  |  |  | **A/A** |
| 3 |  |  |  |  |  |  |  |  | **** |  |  |  |  |  |  |  | **B/X** |
| 4 |  |  |  |  | **A/B** |  |  |  | **** |  |  |  |  |  |  |  | **B/X** |
| 5 |  |  |  |  | **A** |  |  |  | **** |  |  |  |  |  |  |  | **B/X** |
| 6 |  |  |  |  |  |  |  |  | **S4/** |  |  |  |  |  |  |  | **B/X** |
| 7 |  |  |  |  | **B** |  |  |  | **** |  | ***004/?** |  |  |  |  |  | **B/X** |
| 8 |  |  |  |  | **A** |  |  |  | **S4** |  |  |  |  |  |  |  | **B/X** |
| 9 |  |  |  |  |  |  |  |  | **** |  | ***004/?** |  |  |  |  |  | **A/A** |
| 10 |  |  |  |  |  |  |  |  | **** |  | ***004/?** |  |  |  |  |  | **A/A** |
| 11 |  |  |  |  | **B** |  |  |  | **** |  | ***004/?** |  |  |  |  |  | **B/X** |
| 12 |  |  |  |  | **A/B** |  |  |  | **S4** |  |  |  |  |  |  |  | **B/X** |
| 13 |  |  |  |  | **B** |  |  |  | **** |  | ***004/?** |  |  |  |  |  | **B/X** |
| 14 |  |  |  |  | **B** |  |  |  | **** |  | ***004/?** |  |  |  |  |  | **B/X** |
| 15 |  |  |  |  |  |  |  |  | **** |  | ***004/?** |  |  |  |  |  | **A/A** |
| 16 |  |  |  |  |  |  |  |  | **S4/** |  |  |  |  |  |  |  | **B/X** |
| 17 |  |  |  |  | **A** |  |  |  | **** |  |  |  |  |  |  |  | **B/X** |
| 18 |  |  |  |  | **A/B** |  |  |  |  |  |  |  |  |  |  |  | **B/X** |
| 19 |  |  |  |  |  |  |  |  | **S4/** |  |  |  |  |  |  |  | **A/A** |
| 20 |  |  |  |  |  |  |  |  | **** |  | ***004/?** |  |  |  |  |  | **B/X** |

**KIR gene profile analysis of donors**

Numbers identifying the donors correspond to the LCL in Table S5. The presence (grey boxes) or absence (white boxes) of the indicated KIR genes are displayed. Two different sets of primers were used to discriminate between *2DL5A* and *2DL5B* indicated in the box 2DL5. Two different sets of primers were used to discriminate between *KIR2DS4* coding for membrane-bound receptors (S4) and for putative soluble receptors (****). *KIR3DL1*004/?* indicates the presence of at least one *KIR3DL1*004* allele.

**Table S7.**

**KIR-ligands and permissive inhibitory KIRs in the various effector/target pairs, L.U. 20% of DTT- and Leu-SH-treated LCLs**

| **Effector** | ***KIR-ligand**  **effector** | **Target** | **^KIR-ligand**  **target** | **‡Permissive**  **inhibitory KIR (effector)** | **L.U. 20%**  **DTT** | **L.U. 20%**  **Leu-SH** |
| --- | --- | --- | --- | --- | --- | --- |
| **19** | C1/C2, **Bw4** | 13 | C1/C2 | **3DL1** | 15.0 | 8.5 |
| **3** | C1/**C2, A Bw4** | 15 | C1/C1 | **2DL1,** **3DL1** | 12.0 | 8.7 |
| **17** | C1/C2, **A Bw4** | 13 | C1/C2 | **3DL1** | 11.0 | 8.0 |
| **1** | C1/C2, **Bw4, A Bw4** | 20 | C1/C2 | **3DL1** | 8.3 | 7.0 |
| **3** | C1/**C2,** A Bw4 | 2 | C1/C1, Bw4 | **2DL1** | 9.4 | 8.3 |
| **2** | C1/C1, **Bw4** | 15 | C1/C1 | 2DL1, **3DL1** | 14.3 | 14.0 |
| **5** | C1/**C2** | 4 | C1/C1 | **2DL1,** 3DL1 | 1.9 | 3.2 |
| **7** | **C1/C1, Bw4** | 10 | C2/C2 | **2DL2/L3**, **3DL1** | 10.1 | 19.1 |
| **10** | **C2/C2** | 7 | C1/C1, Bw4 | **2DL1** | 10.9 | 25.1 |
| **9** | **C1**/C2, Bw4 | 12 | C2/C2, Bw4 | **2DL3** | 2.2 | 8.7 |
| **8** | C1/**C2** | 4 | C1/C1 | **2DL1,** 3DL1 | 0.01 | 5.1 |
| **13** | C1/C2 | 17 | C1/C2, A Bw4 |  | 1.0 | 0.1 |
| **19** | C1/C2, Bw4 | 17 | C1/C2, A Bw4 |  | 4.3 | 1.4 |
| **17** | C1/C2, A Bw4 | 19 | C1/C2, Bw4 |  | 6.1 | 3.8 |
| **13** | C1/C2 | 19 | C1/C2, Bw4 |  | 3.1 | 2.7 |
| **20** | C1/C2 | 1 | C1/C2, Bw4, A Bw4 |  | 11.4 | 16.3 |
| **18** | C1/C1, **Bw4** | 20 | C1/C2 | § | 1.9 | 4.3 |
| **2** | C1/C1,Bw4 | 3 | C1/C2, A Bw4 |  | 0.7 | 1.9 |
| **4** | C1/C1 | 8 | C1/C2 | 3DL1 | 3.6 | 12.2 |
| **15** | C1/C1 | 2 | C1/C1, Bw4 | 2DL1 | 1.2 | 4.3 |
| **4** | C1/C1 | 5 | C1/C2 | 3DL1 | 1.4 | 5.7 |
| **5** | C1/C2 | 8 | C1/C2 | 3DL1 | 3.1 | 12.5 |

*KIR ligands expressed in the samples used as effectors; the KIR-ligand mismatch in the alloreactive setting is indicated in bold.

^KIR ligands expressed in the samples used as target (LCLs).

**‡**KIR permissive for alloreactivity expressed in the samples used as effectors; in bold are the KIRs specific for KIR-ligand mismatch. KIR expression was confirmed by phenotype analysis.

§ Donor missing *KIR3DL1*

**Supplemental Methods**

**Antibodies, flow cytometry and immunoblotting**

The following antibodies were used: CD107a-FITC (H4A3), CD3-Alexa-700 (UCHT1) and CD56-PE-Cy7 (B159), FITC-conjugated rat anti-mouse IgG1 (A85-1) and PE-conjugated rat anti-mouse IgM (R6-60.2) purchased from BD Biosciences; KIR2DL1/2DS1-PC5.5 (EB6B), KIR2DL2/L3/S2-PE (GL-183) and Goat F(ab’)2 Fragment anti-mouse IgG FITC (IM1619) purchased from Beckman Coulter; NKG2A-Alexa Fluor 700 (131411), KIR3DL1-APC (DX9), ULBP1-PE (170818), ULBP2/5/6-PE (165903), ULBP3-PE (166510), MICA (159227), MICB (236511), TRAIL/R2-APC (17908), CD155/PVR-PE (300907), Nectin2/CD112-APC (610603) purchased from R&D Systems; others anti-KIR mAb that recognize KIRs are 11PB6 (IgG1, anti-KIR2DL1/S1), GL-183 (IgG1, anti-KIR2DL2/L3/S2), Z27 (IgG1, anti-KIR3DL1/S1), FES172 (IgG2A, anti-KIR2DS4) (5); W6/32 recognizes human fully-assembled MHC class I heavy chains (6, 7). For indirect staining, goat F(ab’)2 Fragment anti-mouse IgG FITC (IM1619) was used. Murine mAbs 4D2 and 6H9 recognize native and denatured human ERAP1, respectively. Mouse mAb 3F5 recognizes both native and denatured human ERAP2. All ERAPs Abs were kindly provided by P. van Endert. Flow cytometry was performed on FACSCalibur or FACSCantoII with FACSDiva Software (BD Bioscences). Whole-cell extracts, obtained as previously described (8), were quantified by the bicinchoninic acid assay (Pierce), resolved on 8% SDS-PAGE and electroblotted. Anti-ERp57 Ab was used as loading control.

**ERAP1 activity assay**

ERAP1 activity was evaluated as previously described (9). Briefly, cells were lysed at 4°C in 500 µl of a 1% Triton X-100 buffer (50 mM Tris pH 7.5 and 150 mM NaCl). After high-speed centrifugation, clarified lysates containing 500 µg proteins were incubated overnight at 4°C with protein G-Sepharose beads coated with preimmune serum and then for 2 hours at 4°C with protein G-Sepharose beads pre-coated with 10 µg mAb 4D2. ERAP1-bound Sepharose beads were washed three times and suspended in 100 µl Tris-HCl buffer (50 mM Tris pH 7.5 and 1 mM DTT) containing 40 µM Leu-AMC. After 1 hour at 37°C, the reaction was terminated by addition of 1% SDS and the fluorescence intensity was measured by an LS50B fluorometer (Perkin Elmer) with excitation at 380 nm and emission at 440 nm.

**Quantitative mRNA expression**

Total RNA was extracted using TRIzol Reagent (Invitrogen). First-strand cDNA was synthesized using the SuperScript II First Strand cDNA synthesis kit (Invitrogen). Quantitative real-time PCR (qPCR) reactions were performed using pre-validated TaqMan gene expression assays from Applied Biosystems (Hs00429970_m1 for ERAP1, Hs99999903_m1 for -actin). Relative gene expression was determined using the 2-∆∆Ct method (32) with ß-actin as endogenous control.

**Cytotoxicity and degranulation assay**

Cytotoxic activity was evaluated by 51Cr release assay. 51Cr-labeled target cells (5 × 103) were mixed with NK cells at different effector-target (E:T) cell ratios and incubated at 37°C. After 4 hours, 25 μL supernatant were harvested, and the release of 51Cr was measured with a TopCount NXT beta detector (Perkin Elmer). All experimental groups were analysed in triplicate and the percentage of specific lysis was determined as follows: 100 × (mean cpm experimental release - mean cpm spontaneous release)/(mean cpm total release - mean cpm spontaneous release).

The degranulation assay was performed to quantify cell-surface CD107a expression. Briefly, NK cells were co-cultured with target cells at different ratios, depending on the size of tumor cell lines (1:1 or 1:3) in complete medium at 37°C. After the first hour, anti-CD107a mAb was added and after 2 hours cells were washed and stained with a mixture of mAbs reacting with CD3, CD56 and KIRs to analyze the surface expression of CD107a on each single-inhibitory receptor positive NK-cell subset.

**Inhibitory NK cell synapses**

NK cells were co-cultured with DAOY cells at a 2:1 E:T ratio for 10 min at 37°C and then fixed in 2% paraformaldehyde for 30 min at 37°C, washed and loaded on positive charged SuperFrost Plus microscope slides (Thermo Scientific). After drying, samples were permeabilized with 0.01% Triton for 1 min, washed and incubated for 30 min at RT with PBS 1% BSA plus 5% normal goat serum (Sigma-Aldrich). Slides were stained with anti-KIR2DL3 (GL-183) over night in humid chamber at 4°C. Then, slides were washed and incubated with secondary Ab goat anti-mouse Alexa Fluor 488 (Molecular Probes) for 1 hour at RT. Images were acquired by FV1000 Olympus Confocal Microscope using an immersion oil with laser 60X objective (numerical aperture 1.42). Z reconstructions were performed with a scanning mode of 1024 X 1024 pixels, sampling speed of 20 s/pixel and z stack of 0.4 s/slice. Each image group was processed using the same settings (i.e. laser power and detector amplification) and analyzed by FV10 ASW software (version 2.0).

**Data processing**

Digital images of Western blots were analyzed by Image J, (http://rsbweb.nih.gov/ij/index.html). The change of MHC-I expression following Leu-SH treatment of LCLs was shown by applying the following formula: 100-[100*(Leu-SH/DTT)], where Leu-SH is the mean fluorescence intensity (MFI) of Leu-SH-treated cells and DTT is MFI of DTT-treated cells. Data were presented as the opposite of the obtained value.

**Supplemental References**

1. Draenert R, Le Gall S, Pfafferott KJ, Leslie AJ, Chetty P, Brander C, et al. Immune selection for altered antigen processing leads to cytotoxic T lymphocyte escape in chronic HIV-1 infection. J Exp Med. 2004;199:905-15.

2. Leslie A, Kavanagh D, Honeyborne I, Pfafferott K, Edwards C, Pillay T, et al. Transmission and accumulation of CTL escape variants drive negative associations between HIV polymorphisms and HLA. J Exp Med. 2005;201:891-902.

3. Rist M, Smith C, Bell MJ, Burrows SR, Khanna R. Cross-recognition of HLA DR4 alloantigen by virus-specific CD8+ T cells: a new paradigm for self-/nonself-recognition. Blood. 2009;114:2244-53.

4. Rotzschke O, Falk K, Deres K, Schild H, Norda M, Metzger J, et al. Isolation and analysis of naturally processed viral peptides as recognized by cytotoxic T cells. Nature. 1990;348:252-4.

5. Falco M, Romeo E, Marcenaro S, Martini S, Vitale M, Bottino C, et al. Combined genotypic and phenotypic killer cell Ig-like receptor analyses reveal KIR2DL3 alleles displaying unexpected monoclonal antibody reactivity: identification of the amino acid residues critical for staining. J Immunol. 2010;185:433-41.

6. Barnstable CJ, Bodmer WF, Brown G, Galfre G, Milstein C, Williams AF, et al. Production of monoclonal antibodies to group A erythrocytes, HLA and other human cell surface antigens-new tools for genetic analysis. Cell. 1978;14:9-20.

7. Kovats S, Main EK, Librach C, Stubblebine M, Fisher SJ, DeMars R. A class I antigen, HLA-G, expressed in human trophoblasts. Science. 1990;248:220-3.

8. Forloni M, Albini S, Limongi MZ, Cifaldi L, Boldrini R, Nicotra MR, et al. NF-kappaB, and not MYCN, regulates MHC class I and endoplasmic reticulum aminopeptidases in human neuroblastoma cells. Cancer Res. 2010;70:916-24.

9. Fruci D, Ferracuti S, Limongi MZ, Cunsolo V, Giorda E, Fraioli R, et al. Expression of endoplasmic reticulum aminopeptidases in EBV-B cell lines from healthy donors and in leukemia/lymphoma, carcinoma, and melanoma cell lines. J Immunol. 2006;176:4869-79.
